# Supplementary material
Source: PubMed Central journal article supplement (PMC5314208)
Supplement: NIHMS840061-supplement-Supplemental_Material.pdf [file NIHMS840061-supplement-Supplemental_Material.pdf]

## Supplemental Material

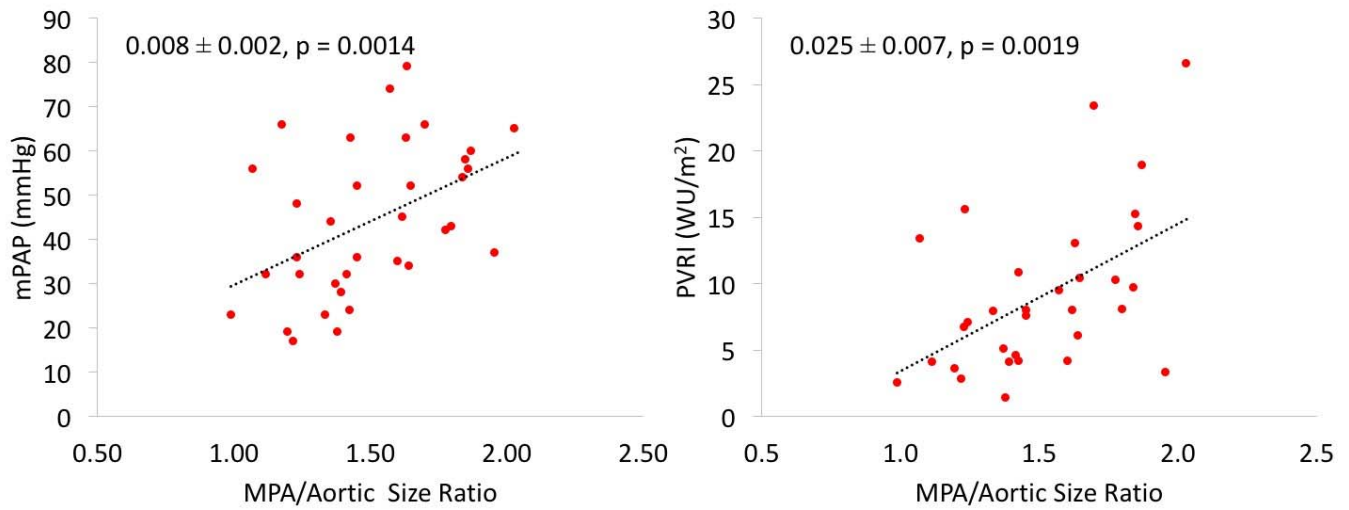

Supplemental Figure. Associations between standard catheterization hemodynamic metrics and MPA to ascending aortic size ratio. As expected, both invasive hemodynamic indices revealed positive correlations with the ratio. We believe that found associations were most likely driven by mean MPA pressure, since it reflects better on local hemodynamic conditions than PVRI. Both correlations were adjusted for age and sex.
